# Supplementary material for: Retinal Vascular Lesions in Patients with Nonalcoholic Fatty Liver Disease: A Systematic Review and Meta-Analysis
Source: MDPI journal article supplement (doi:10.3390/jpm13071148), 2023-07-17
Supplement: s1 [file s1]

**Table S1.** The main demographic and laboratory characteristics per group of each study included in the systematic review and meta-analysis.

| First author,<br>Year, Origin<br>Reference * | Group   | N   | Females<br>(n)   | DM<br>(n) | Hyper<br>tensio<br>n (n) | Age (years)                | BMI (kg/m2)               | Waist<br>circumference<br>(cm) | AST (IU/L)                 | ALT (IU/L)                 | GGT (IU/L)                 | HOMA-IR     | Retinopathy<br>(n) |
|----------------------------------------------|---------|-----|------------------|-----------|--------------------------|----------------------------|---------------------------|--------------------------------|----------------------------|----------------------------|----------------------------|-------------|--------------------|
| Afarideh, 2019,<br>Iran <sup>18</sup>        | Control | 687 | 485 <sup>†</sup> | 687       | na                       | 57.64 ± 9.38 <sup>†</sup>  | 29.00 ± 4.71 <sup>†</sup> | 98.68 ± 10.43 <sup>†</sup>     | na                         | na                         | na                         | 3.94 ± 2.76 | 131                |
|                                              | NAFLD   | 248 |                  | 248       | na                       |                            |                           |                                | na                         | na                         | na                         |             | 10                 |
| Ciardullo, 2020,<br>Italy <sup>19</sup>      | Control | 344 | 242 <sup>†</sup> | 344       | na                       | 67.00 ± 11.00 <sup>†</sup> | 30.56 ± 6.00 <sup>†</sup> | 106.00 ± 14.00 <sup>†</sup>    | 22.00 ± 14.00 <sup>†</sup> | 26.00 ± 20.00 <sup>†</sup> | 47.00 ± 70.00 <sup>†</sup> | na          | 48                 |
|                                              | NAFLD   | 590 |                  | 590       | na                       |                            |                           |                                |                            |                            |                            | na          | 111                |
| Ekpanyapong,<br>2018, Thailand <sup>20</sup> | Control | 31  | 118 <sup>†</sup> | 31        | 129 <sup>†</sup>         | 58.50 ± 12.00 <sup>†</sup> | 26.80 ± 4.80 <sup>†</sup> | 90.10 ± 11.20 <sup>†</sup>     | 20.40 ± 5.70 <sup>†</sup>  | 20.70 ± 7.50 <sup>†</sup>  | na                         | na          | 2                  |
|                                              | NAFLD   | 149 |                  | 149       |                          |                            |                           |                                |                            |                            | na                         | na          | 24                 |
| Feng, 2019,<br>China <sup>21</sup>           | Control | 26  | 34 <sup>†</sup>  | 26        | 45 <sup>†</sup>          | 46.61 ± 3.35 <sup>†</sup>  | 32.73 ± 0.90 <sup>†</sup> | 108.26 ± 1.80 <sup>†</sup>     | na                         | na                         | na                         | na          | 7                  |

|                                         |         |     |                  |     |     |                            |                           |                             |                            |                            |                            |             |     |
|-----------------------------------------|---------|-----|------------------|-----|-----|----------------------------|---------------------------|-----------------------------|----------------------------|----------------------------|----------------------------|-------------|-----|
|                                         | NAFLD   | 50  |                  | 50  |     |                            |                           |                             | na                         | na                         | na                         | na          | 6   |
| Gunaid, 2018,<br>Yemen <sup>22</sup>    | Control | 117 | na               | 117 | na  | na                         | na                        | na                          | na                         | na                         | na                         | na          | 2   |
|                                         | NAFLD   | 308 | na               | 308 | na  | na                         | na                        | na                          | na                         | na                         | na                         | na          | 5   |
| Hashimoto, 2020,<br>Japan <sup>23</sup> | Control | 228 | 171 <sup>†</sup> | 228 | na  | 66.40 ± 10.60 <sup>†</sup> | 24.30 ± 4.10 <sup>†</sup> | na                          | 24.00 ± 1.71 <sup>†</sup>  | 20.00 ± 2.39 <sup>†</sup>  | na                         | na          | 56  |
|                                         | NAFLD   | 134 |                  | 134 | na  |                            |                           | na                          |                            |                            | na                         | na          | 22  |
| Hermans, 2017,<br>Belgium <sup>24</sup> | Control | 117 | na               | 117 | na  | na                         | na                        | na                          | na                         | na                         | na                         | na          | 56  |
|                                         | NAFLD   | 296 | na               | 296 | na  | na                         | na                        | na                          | na                         | na                         | na                         | na          | 47  |
| Hermans, 2022,<br>Belgium <sup>25</sup> | Control | 237 | 102              | 237 | 206 | 70.00 ± 13.00 <sup>†</sup> | 29.10 ± 5.80 <sup>†</sup> | 103.00 ± 14.00 <sup>†</sup> | 27.00 ± 15.00 <sup>†</sup> | 30.00 ± 24.00 <sup>†</sup> | 47.00 ± 58.00 <sup>†</sup> | na          | 90  |
|                                         | NAFLD   | 507 | 188              | 507 | 454 |                            |                           |                             |                            |                            |                            | na          | 118 |
| Kim, 2014,<br>Korea <sup>26</sup>       | Control | 341 | 175              | 341 | 205 | 59.30 ± 11.90              | 23.30 ± 3.40              | na                          | 25.10 ± 43.70              | 30.10 ± 80.90              | 49.20 ± 52.50              | 3.30 ± 2.80 | 239 |

|                                     |         |          |                  |     |                  |                           |                          |                            |                           |                           |                             |                 |     |
|-------------------------------------|---------|----------|------------------|-----|------------------|---------------------------|--------------------------|----------------------------|---------------------------|---------------------------|-----------------------------|-----------------|-----|
|                                     | NAFLD   | 588      | 264              | 588 | 406              | $56.70 \pm 11.70$         | $25.80 \pm 3.50$         | na                         | $29.20 \pm 37.50$         | $37.90 \pm 68.80$         | $67.50 \pm 138.60$          | $5.00 \pm 4.80$ | 194 |
| Leite, 2009, Brazil <sup>27</sup>   | Control | 55       | 38               | 55  | 43               | $54.30 \pm 8.10$          | $27.00 \pm 3.60$         | $95.30 \pm 7.70$           | $21.5 \pm 2.19$           | $35.75 \pm 1.97$          | $36.25 \pm 5.48$            | na              | 25  |
|                                     | NAFLD   | 125      | 88               | 125 | 106              | $55.60 \pm 7.10$          | $31.30 \pm 5.40$         | $104.60 \pm 12.20$         | $20.75 \pm 1.75$          | $40.00 \pm 3.11$          | $42.00 \pm 5.82$            | na              | 40  |
| Lin, 2016, Taiwan <sup>28</sup>     | Control | 429<br>3 | 2418             | 486 | na               | $54.03 \pm 0.32^\dagger$  | na                       | $95.74 \pm 0.33^\dagger$   | na                        | na                        | na                          | na              | 243 |
|                                     | NAFLD   | 167<br>0 | 784              | 459 | na               |                           | na                       |                            | na                        | na                        | na                          | na              | 130 |
| Lombardi, 2020, Italy <sup>29</sup> | Control | 43       | 189 <sup>†</sup> | 43  | 306 <sup>†</sup> | $68.00 \pm 10.00^\dagger$ | $29.00 \pm 5.00^\dagger$ | $101.00 \pm 12.00^\dagger$ | $39.50 \pm 17.62^\dagger$ | $73.75 \pm 41.85^\dagger$ | $182.25 \pm 114.38^\dagger$ | na              | 6   |
|                                     | NAFLD   | 351      |                  | 351 |                  |                           |                          |                            |                           |                           |                             | na              | 57  |
| Lv, 2013, China <sup>30</sup>       | Control | 475      | 287              | 475 | na               | $65.11 \pm 11.70$         | $24.33 \pm 2.87$         | $88.75 \pm 8.72$           | $18.23 \pm 6.74$          | $17.16 \pm 8.19$          | $19.47 \pm 16.32$           | na              | 249 |
|                                     | NAFLD   | 742      | 470              | 742 | na               | $62.29 \pm 12.52$         | $27.49 \pm 3.37$         | $96.76 \pm 10.32$          | $22.34 \pm 9.00$          | $25.72 \pm 13.01$         | $25.05 \pm 17.94$           | na              | 304 |

[illegible]

| Study                                          | Group   | n       |                  | n       |       | ALT (U/L)                  |                           | AST (U/L)     |               | ALP (U/L)     |               | GGT (U/L)   |       | P value |
|------------------------------------------------|---------|---------|------------------|---------|-------|----------------------------|---------------------------|---------------|---------------|---------------|---------------|-------------|-------|---------|
|                                                |         | Control | NAFLD            | Control | NAFLD | Control                    | NAFLD                     | Control       | NAFLD         | Control       | NAFLD         | Control     | NAFLD |         |
| Popa, 2020, Romania <sup>12</sup>              | Control | 105     | 58               | 105     | 48    | 38.50 ± 13.00              | 23.40 ± 3.60              | 83.60 ± 10.90 | 20.00 ± 11.50 | 21.00 ± 14.00 | 18.00 ± 14.50 | na          | na    | 55      |
|                                                | NAFLD   | 46      | 16               | 46      | 24    | 44.90 ± 12.10              | 25.60 ± 4.50              | 93.80 ± 13.50 | 25.00 ± 17.00 | 26.00 ± 16.70 | 24.00 ± 22.50 | na          | na    | 32      |
| Ren, 2023, China <sup>35</sup>                 | Control | 40      | 21               | 40      | na    | 56.90 ± 9.80               | 23.90 ± 3.90              | na            | 19.20 ± 7.40  | 21.70 ± 14.70 | 28.90 ± 24.80 | 2.10 ± 1.00 | na    | 23      |
|                                                | NAFLD   | 41      | 18               | 41      | na    | 53.90 ± 10.60              | 26.20 ± 4.00              | na            | 31.50 ± 26.10 | 49.90 ± 60.90 | 39.90 ± 30.20 | 3.40 ± 1.90 | na    | 29      |
| Rivera-Esteban, 2022, Spain <sup>36</sup>      | Control | 88      | na               | 62      | na    | na                         | na                        | na            | na            | na            | na            | na          | na    | 20      |
|                                                | NAFLD   | 155     | na               | 124     | na    | na                         | na                        | na            | na            | na            | na            | na          | na    | 30      |
| Romero-Ibarguengoitia, 2017, USA <sup>13</sup> | Control | 112     | 106 <sup>†</sup> | 0       | 0     | 28.36 ± 8.11               | 24.50 ± 5.10              | na            | 22.54 ± 7.00  | 21.48 ± 13.50 | na            | na          | na    | 21      |
|                                                | NAFLD   | 40      |                  | 0       | 0     | 35.50 ± 7.46               | 35.50 ± 7.80              | na            | 26.30 ± 1.12  | 32.90 ± 13.95 | na            | na          | na    | 29      |
| Sawadjaan, 2020, Philippines <sup>37</sup>     | Control | 45      | 35 <sup>†</sup>  | 45      | na    | 56.12 ± 13.04 <sup>†</sup> | 29.01 ± 5.88 <sup>†</sup> | na            | na            | na            | na            | na          | na    | 2       |



| Study                                  | Group   | N   | Age (yr)        | Male (%) | HBsAg (+)       | ALT (U/L)                  | AST (U/L)                 | Platelets (10 <sup>9</sup> /L) | APRI          | APRI (F)      | APRI (M)      | APRI (F+M)  | N   |
|----------------------------------------|---------|-----|-----------------|----------|-----------------|----------------------------|---------------------------|--------------------------------|---------------|---------------|---------------|-------------|-----|
| Targher, 2010, Italy <sup>42</sup>     | Control | 91  | 55              | 91       | na              | 37.00 ± 12.00              | 22.50 ± 3.00              | na                             | 20.00 ± 6.00  | 20.00 ± 8.00  | 17.00 ± 9.00  | na          | 18  |
|                                        | NAFLD   | 111 | 41              | 111      | na              | 47.00 ± 12.00              | 26.60 ± 5.00              | na                             | 25.00 ± 11.00 | 29.00 ± 17.00 | 29.00 ± 20.00 | na          | 59  |
| Tripolino, 2019, Italy <sup>43</sup>   | Control | 75  | 54 <sup>†</sup> | 75       | 14 <sup>†</sup> | 37.00 ± 11.30 <sup>†</sup> | 24.57 ± 3.85 <sup>†</sup> | na                             | na            | na            | na            | na          | 16  |
|                                        | NAFLD   | 47  |                 | 47       |                 |                            |                           | na                             | na            | na            | na            | na          | 18  |
| Vendhan, 2014, India <sup>44</sup>     | Control | 225 | na              | na       | na              | na                         | na                        | na                             | na            | na            | na            | na          | 122 |
|                                        | NAFLD   | 130 | na              | na       | na              | na                         | na                        | na                             | na            | na            | na            | na          | 77  |
| Viswanathan, 2010, India <sup>45</sup> | Control | 142 | 52              | 142      | 58              | 49.00 ± 11.00              | 26.40 ± 4.00              | na                             | 27.60 ± 17.30 | 22.40 ± 15.40 | na            | na          | 14  |
|                                        | NAFLD   | 156 | 55              | 156      | 101             | 50.00 ± 10.00              | 29.70 ± 7.00              | na                             | 37.60 ± 24.90 | 29.30 ± 17.90 | na            | na          | 46  |
| Wen, 2022, China <sup>46</sup>         | Control | 747 | 364             | 747      | 393             | 60.00 ± 13.00              | 24.07 ± 3.15              | 89.30 ± 9.60                   | 16.50 ± 0.95  | 14.75 ± 1.43  | na            | 1.20 ± 0.13 | 218 |

|                                      |         |     |     |     |     |                   |                  |                   |                   |                   |                   |                 |     |
|--------------------------------------|---------|-----|-----|-----|-----|-------------------|------------------|-------------------|-------------------|-------------------|-------------------|-----------------|-----|
|                                      | NAFLD   | 118 | 548 | 118 | 642 | $55.00 \pm 14.00$ | $27.31 \pm 3.80$ | $97.60 \pm 10.50$ | $19.75 \pm 1.68$  | $23.25 \pm 2.90$  | na                | $1.83 \pm 0.17$ | 229 |
|                                      |         | 1   |     | 1   |     |                   |                  |                   |                   |                   |                   |                 |     |
| Yan, 2016,<br>China <sup>47</sup>    | Control | 69  | 31  | 69  | 28  | $56.74 \pm 11.51$ | $23.75 \pm 3.78$ | na                | $16.74 \pm 5.08$  | $17.20 \pm 8.01$  | $21.35 \pm 18.75$ | na              | 26  |
|                                      | NAFLD   | 143 | 61  | 143 | 76  | $52.20 \pm 10.07$ | $28.41 \pm 3.58$ | na                | $23.70 \pm 17.76$ | $20.23 \pm 10.75$ | $43.32 \pm 34.54$ | na              | 54  |
| Yang, 2015,<br>China <sup>48</sup>   | Control | 158 | 224 | 167 | 406 | $61.94 \pm 9.95$  | $24.31 \pm 2.90$ | na                | na                | na                | na                | na              | 463 |
|                                      |         | 2   |     |     |     |                   |                  |                   |                   |                   |                   |                 |     |
|                                      | NAFLD   | 872 | 87  | 114 | 304 | $63.06 \pm 10.13$ | $26.19 \pm 3.14$ | na                | na                | na                | na                | na              | 427 |
| Yoneda, 2012,<br>Japan <sup>49</sup> | Control | 119 | 65  | 119 | na  | $47.90 \pm 1.40$  | $21.90 \pm 0.20$ | na                | $20.80 \pm 0.70$  | $18.60 \pm 0.90$  | $26.50 \pm 5.10$  | na              | 11  |
|                                      | NAFLD   | 25  | 17  | 25  | na  | $54.00 \pm 3.00$  | $26.80 \pm 0.60$ | na                | $26.70 \pm 2.70$  | $27.30 \pm 3.40$  | $63.20 \pm 19.70$ | na              | 7   |
| Zhang, 2019,<br>China <sup>50</sup>  | Control | 161 | 70  | 161 | 32  | $58.04 \pm 10.68$ | $24.08 \pm 3.03$ | $88.80 \pm 8.87$  | $21.50 \pm 1.88$  | $20.12 \pm 18.61$ | $20.75 \pm 2.63$  | na              | 75  |
|                                      | NAFLD   | 250 | 145 | 250 | 48  | $58.44 \pm 11.80$ | $26.69 \pm 3.69$ | $95.16 \pm 11.80$ | $24.00 \pm 2.49$  | $29.10 \pm 3.35$  | $27.50 \pm 3.56$  | na              | 93  |

---

\*References are classified according to the first author's surname.

†Data referring to the whole population instead of per group for each study.



*Abbreviations:* ALT, alanine aminotransaminase; AST, aspartate aminotransaminase; BMI, body mass index; DM, diabetes mellitus; GGT, gamma-glutamyltranspeptidase; na, not available; HOMA-IR, homeostasis model assessment insulin resistance.

[illegible][illegible]

|                                           |   |   |   |   |   |   |   |   |   |   |
|-------------------------------------------|---|---|---|---|---|---|---|---|---|---|
| Somalwar, 2014,<br>India <sup>38</sup>    | 1 | 1 | 0 | 1 | 0 | 1 | 1 | 1 | 1 | 7 |
| Takeuchi, 2012, Japan <sup>39</sup>       | 1 | 1 | 0 | 1 | 0 | 0 | 1 | 1 | 1 | 6 |
| Tanabe, 2020, Japan <sup>40</sup>         | 1 | 0 | 0 | 1 | 0 | 0 | 1 | 1 | 1 | 5 |
| Targher, 2008, Italy <sup>41</sup>        | 1 | 1 | 0 | 1 | 0 | 0 | 1 | 1 | 1 | 6 |
| Targher, 2010, Italy <sup>42</sup>        | 1 | 1 | 0 | 1 | 0 | 0 | 1 | 1 | 1 | 6 |
| Tripolino, 2019, Italy <sup>43</sup>      | 1 | 1 | 0 | 1 | 0 | 0 | 1 | 1 | 1 | 6 |
| Vendhan, 2014, India <sup>44</sup>        | 1 | 1 | 0 | 1 | 0 | 0 | 1 | 1 | 1 | 6 |
| Viswanathan, 2010,<br>India <sup>45</sup> | 1 | 1 | 0 | 1 | 0 | 1 | 1 | 1 | 1 | 7 |
| Wen, 2022, China <sup>46</sup>            | 1 | 1 | 0 | 1 | 0 | 0 | 1 | 1 | 1 | 6 |
| Yan, 2016, China <sup>47</sup>            | 1 | 0 | 0 | 1 | 0 | 0 | 1 | 1 | 1 | 5 |
| Yang, 2015, China <sup>48</sup>           | 1 | 1 | 1 | 1 | 0 | 0 | 1 | 1 | 1 | 7 |
| Yoneda, 2012, Japan <sup>49</sup>         | 1 | 0 | 0 | 1 | 0 | 1 | 0 | 1 | 1 | 5 |
| Zhang, 2019, China <sup>50</sup>          | 1 | 0 | 0 | 1 | 0 | 1 | 1 | 1 | 1 | 6 |

\* References are classified according to the first author's surname.

*Abbreviations:* BMI, body mass index; na, not available; NOS, Newcastle-Ottawa Scale
