# Supplementary material for: Retinal Vascular Lesions in Patients with Nonalcoholic Fatty Liver Disease: A Systematic Review and Meta-Analysis
Source: J Pers Med. 2023 Jul 17;13(7):1148. doi: 10.3390/jpm13071148 (PMC10381395; doi:10.3390/jpm13071148)
Supplement: Supplementary file 1 [file jpm-13-01148-s001.zip]

Archive with 4 entries (4 files):
- MOOSE_Checklist_sub.pdf
- supplementary figure S1.pptx
- supplementary figure S2.pptx
- supplementary tables.pdf
